# Supplementary material for: Construction of Antifouling Membrane Surfaces through Layer-by-Layer Self-Assembly of Lignosulfonate and Polyethyleneimine
Source: PubMed Central journal article supplement (PMC6918325; doi:10.3390/polym11111782), 2019-10-31
Supplement: polymers-11-01782-s001.pdf [file polymers-11-01782-s001.pdf]

## Supporting Information

### *Construction of antifouling membrane surfaces through layer-by-layer self-assembly of lignosulfonate and polyethyleneimine*

Lin Gu<sup>1</sup>, Meng-Yun Xie<sup>2</sup>, Yu Jin<sup>2</sup>, Min He<sup>2</sup>, Xiao-Yan Xing<sup>2</sup>, Yuan Yu<sup>2</sup>, Qing-Yun Wu<sup>1,2\*</sup>

<sup>1</sup> School of Chemical Engineering and Technology, Sun Yat-sen University, Zhuhai, 519082, China

<sup>2</sup> Faculty of Materials Science and Chemical Engineering, Ningbo University, Ningbo 315211, P.R. China

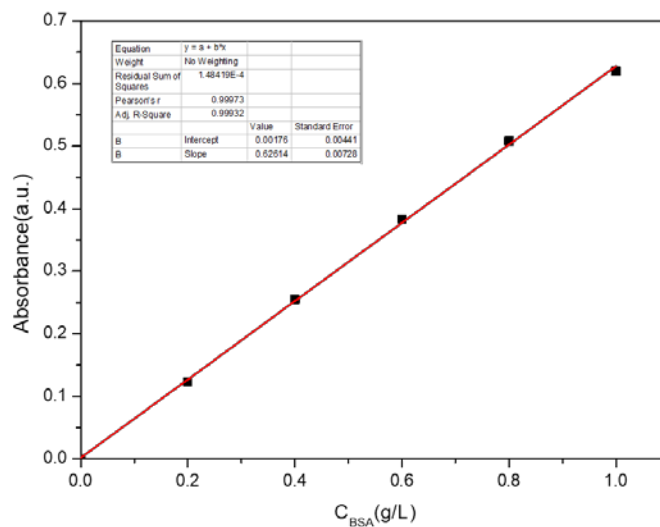

**Figure S1.** A standard curve of UV absorbance-BSA concentration.

\*Corresponding authors. E-mail: wuqingyun@nbu.edu.cn (Q.-Y. Wu)

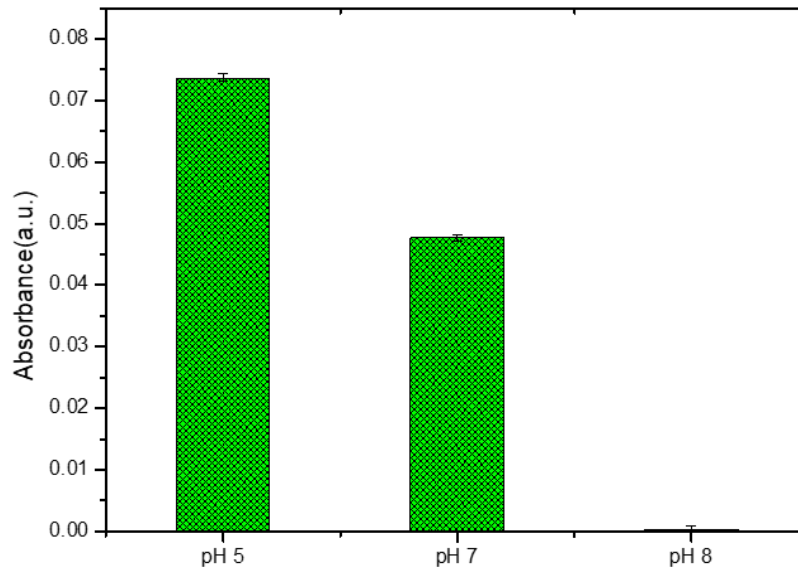

**Figure S2.** UV absorbance at 280 nm of aqueous solutions after immersing the PSf-5BL membranes prepared at different pH values for 2 h.

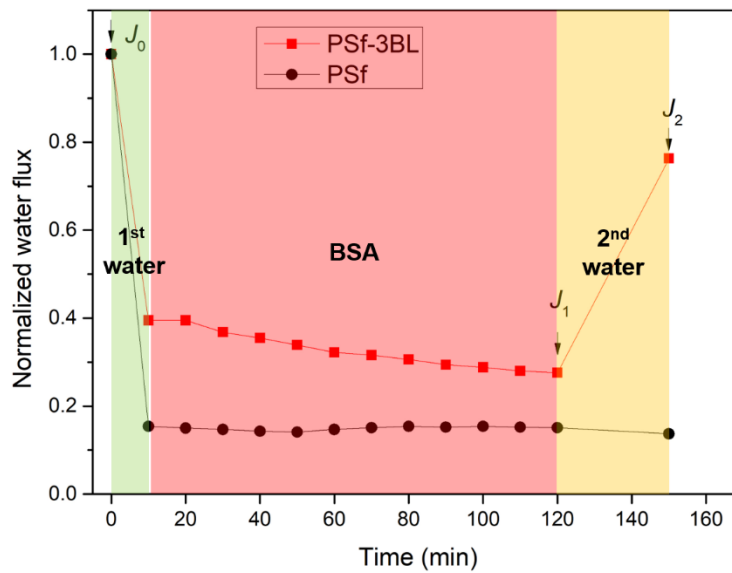

**Figure S3.** Flux of water and BSA: first for pure water, second for BSA and third for pure water after washing the membranes for 30 min.
